# Supplementary material
Source: PubMed Central journal article supplement (PMC4909559)
Supplement: supp_WNL.0000000000002763_Video_e-1_legend.pdf [file supp_WNL.0000000000002763_Video_e-1_legend.pdf]

## **Video Legend**

Palatal tremor with no ear clicking
